# Supplementary material for: An integrated microfluidic 3D tumor system for parallel and high-throughput chemotherapy evaluation
Source: Royal Society of Chemistry journal article supplement (doi:10.1039/d0an01229g), 2020-01-01
Supplement: d0an01229g1.pdf [file d0an01229g1.pdf]

Electronic Supplementary Information (ESI) for Analyst

*This journal is © The Royal Society of Chemistry 2020*

## Electronic Supplementary Information

# An integrated microfluidic 3D tumor system for parallel and throughput chemotherapy evaluation

Wenming Liu,<sup>\*ab</sup> Dan Liu,<sup>b</sup> Rui Hu,<sup>b</sup> Zhongchao Huang,<sup>\*b</sup> Meilin Sun<sup>b</sup> and Kai Han<sup>b</sup>

<sup>a</sup>*Department of Pathology, School of Basic Medical Science, Central South University, Changsha, Hunan 410013, China. E-mail: liuwenming0229@csu.edu.cn*

<sup>b</sup>*Department of Biomedical Engineering, Central South University, Changsha, Hunan 410013, China. E-mail: lipse\_huang@163.com*

**Abstract.** This supplementary information provides all the additional information as mentioned in the text.

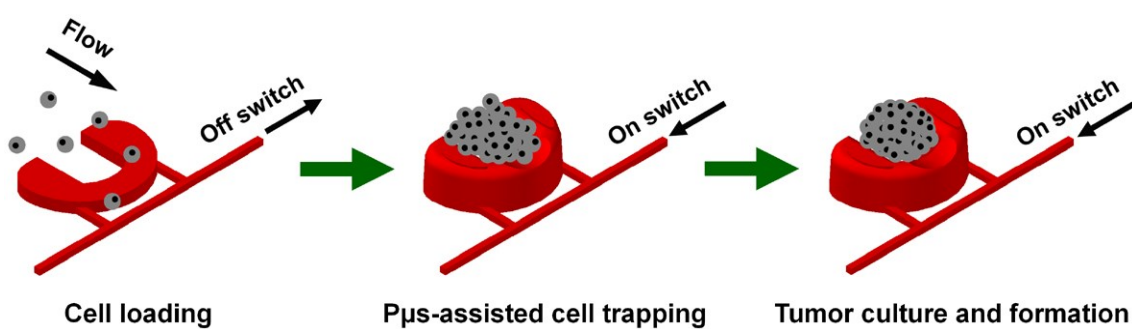

**Fig. S1** On/off switch of P $\mu$ S for cell trapping and localization, as well as 3D tumor culture and formation.

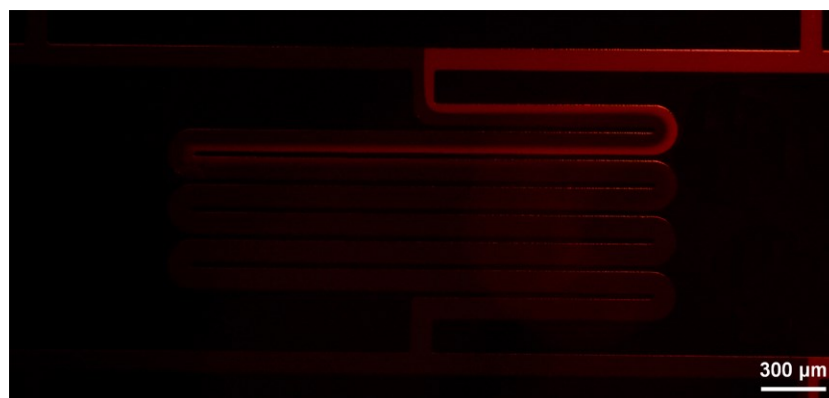

**Fig. S2** Fluorescence image of microfluidic chemical gradient production at a flow rate of 1  $\mu\text{L min}^{-1}$ . A fluorescence dye, i.e., rhodamine B (red) as the model drug was used here for visualization. The sufficient diffusive mixing of two source solutions (i.e., rhodamine B in  $\text{NaHCO}_3$  buffer and fresh  $\text{NaHCO}_3$  buffer) in a laminar flow condition was confirmed.

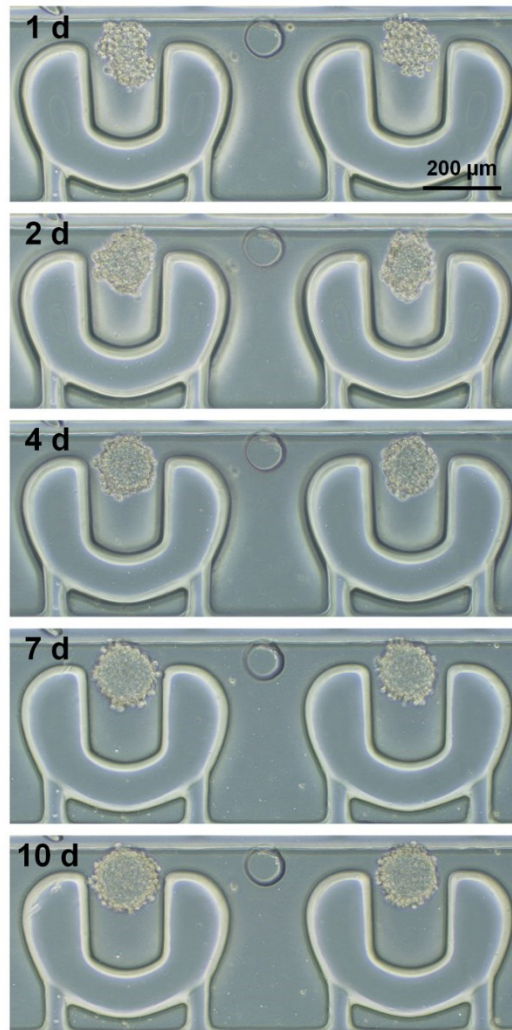

**Fig. S3** Optical images of U251 tumors at different times of cultivation in the microfluidic device.

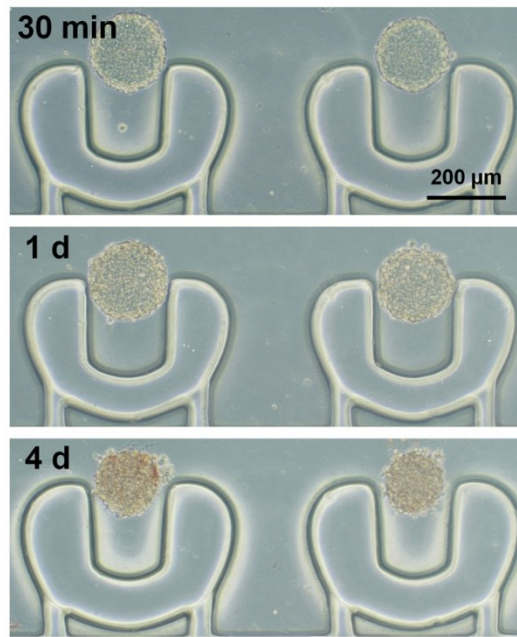

**Fig. S4** Optical images of U251 tumors treated with VNR at the concentration of  $20 \mu\text{g mL}^{-1}$  in the microfluidic device.
